# Supplementary material for: Correction: Personalized glucose forecasting for type 2 diabetes using data assimilation
Source: PLOS journal article supplement (doi:10.1371/journal.pcbi.1009325), 2021-08-20
Supplement: S3 (10.1371/journal.pcbi.1009325.s003) [file journal.pcbi.1009325.s003]

### S3 Appendix.

#### Meal endocrine model

The meal model [1] is composed of two subsystems that represent insulin and glucose kinetics. The glucose subsystem has two compartments, plasma glucose mass  $G_p$  and glucose mass in slowly equilibrating tissues  $G_t$ . Along with modeling the exchange between these two compartments, subprocesses of the glucose subsystem describe the effects of endogenous glucose production (EGP), rate of glucose appearance ( $Ra$ ), renal excretion of glucose ( $E$ ), and insulin-independent and insulin-dependent glucose utilization ( $U_{ii}$  and  $U_{id}$ , respectively). The insulin subsystem has two main compartments, the insulin masses in plasma and liver ( $I_p$  and  $I_l$ , respectively). Subprocesses of the insulin subsystem include insulin secretion  $S$  and insulin degradation in both the liver and periphery.

*Glucose subsystem*

$$\begin{cases} \dot{G}_p(t) = EGP(t) + Ra(t) - U_{ii}(t) - E(t) - k_1 \cdot G_p(t) + k_2 \cdot G_t(t) & G_p(0) = G_{pb} \\ \dot{G}_t(t) = -U_{id}(t) + k_1 \cdot G_p(t) - k_2 \cdot G_t(t) & G_t(0) = G_{tb} \\ G(t) = \frac{G_p}{V_G} & G(0) = G_b \end{cases} \quad (1)$$

*Insulin subsystem*

$$\begin{cases} \dot{I}_l(t) = -(m_1 + m_3(t)) \cdot I_l(t) + m_2 I_p(t) + S(t) & I_l(0) = I_{lb} \\ \dot{I}_p(t) = -(m_2 + m_4) \cdot I_p(t) + m_1 \cdot I_l(t) & I_p(0) = I_{pb} \\ I(t) = \frac{I_p}{V_I} & I(0) = I_b \end{cases} \quad (2)$$

Intestinal absorption of glucose ( $Ra(t)$ )

$$\begin{cases} Q_{sto}(t) = Q_{sto1}(t) + Q_{sto2}(t) & Q_{sto}(0) = 0 \\ \dot{Q}_{sto1}(t) = -k_{gri} \cdot Q_{sto1}(t) + D \cdot d(t) & Q_{sto1}(0) = 0 \\ \dot{Q}_{sto2}(t) = -k_{empt}(Q_{sto}) \cdot Q_{sto2}(t) + k_{gri} \cdot Q_{sto1}(t) & Q_{sto2}(0) = 0 \\ \dot{Q}_{gut}(t) = -k_{abs} \cdot Q_{gut}(t) + k_{empt}(Q_{sto}) \cdot Q_{sto2}(t) & Q_{gut}(0) = 0 \\ Ra(t) = \frac{f \cdot k_{abs} \cdot Q_{gut}(t)}{BW} & Ra(0) = 0 \end{cases} \quad (3)$$

Beta Cell Subprocess (insulin secretion is  $S$ , and insulin mass in the portal vein is  $I_{po}$ )

$$S(t) = \gamma \cdot I_{po}(t) \quad (4)$$

$$\dot{I}_{po}(t) = -\gamma \cdot I_{po}(t) + S_{po}(t), \quad I_{po}(0) = I_{pob} \quad (5)$$

$$S_{po}(t) = \begin{cases} Y(t) + K \cdot \dot{G}(t) + S_b, & \dot{G} > 0 \\ Y(t) + S_b, & \dot{G} \leq 0 \end{cases} \quad (6)$$

$$\dot{Y}(t) = \begin{cases} -\alpha \cdot [Y(t) - \beta \cdot (G(t) - h)], & \beta \cdot (G(t) - h) \geq -S_b \\ -\alpha \cdot Y(t) - \alpha \cdot S_b, & \beta \cdot (G(t) - h) < -S_b \end{cases} \quad (7)$$

Renal excretion of glucose

$$E(t) = \begin{cases} k_{e1} \cdot [G_p(t) - k_{e2}], & G_p(t) > k_{e2} \\ 0, & G_p(t) \leq k_{e2} \end{cases} \quad (8)$$

Endogenous glucose production (EGP)

$$EGP(t) = k_{p1} - k_{p2} \cdot G_p(t) - k_{p3} \cdot I_d(t) - k_{p4} \cdot I_{po}(t) \quad (9)$$

$$EGP(0) = EGP_b \quad (10)$$

Hepatic extraction of insulin was fixed, and the following relations were used to evaluate exchange parameters with respect to  $HE$  and  $S(t)$ .

$$HE(t) = -m_5 \cdot S(t) + m_6, \quad HE(0) = HE_b \quad (11)$$

$$m_3(t) = \frac{HE(t) \cdot m_1}{1 - HE(t)} \quad (12)$$

Insulin delay

$$\begin{cases} \dot{I}_1(t) = -k_i \cdot [I_1(t) - I(t)] & I_1(0) = I_b \\ \dot{I}_d(t) = -k_i \cdot [I_d(t) - I_1(t)] & I_d(0) = I_b \end{cases} \quad (13)$$

Interstitial Insulin

$$\dot{X}(t) = -p_{2U} \cdot X(t) + p_{2U}[I(t) - I_b] \quad X(0) = 0 \quad (14)$$

Glucose Utilization (Michaelis-Menten kinetics contribute to insulin-dependent glucose utilization)

$$V_m(X(t)) = V_{m0} + V_{mx} \cdot X(t) \quad (15)$$

$$K_m(X(t)) = K_{m0} + K_{mx} \cdot X(t) \quad (16)$$

$$U_{id}(t) = \frac{V_m(X(t)) \cdot G_t(t)}{K_m(X(t)) + G_t(t)} \quad (17)$$

$$U_{ii}(t) = F_{cns} \quad (18)$$

Stomach emptying rate [2]

$$k_{\text{empt}}(Q_{\text{sto}}) = k_{\text{min}} + \frac{k_{\text{max}} - k_{\text{min}}}{2} \cdot \{\tanh[a_{\text{meal}}(Q_{\text{sto}} - b \cdot D)] - \tanh[b_{\text{meal}}(Q_{\text{sto}} - c \cdot D)] + 2\} \quad (19)$$

$$\alpha_{\text{meal}} = \frac{5}{2 \cdot D \cdot (1 - b)} \quad (20)$$

$$\beta_{\text{meal}} = \frac{5}{2 \cdot D \cdot c} \quad (21)$$

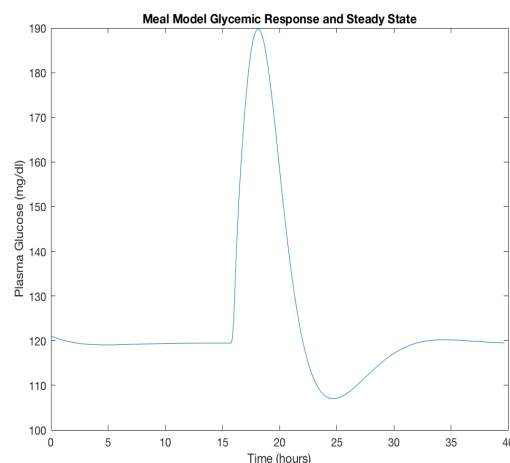

**Fig 1.** Simulation of post-prandial glucose response and return to equilibrium modeled by the meal model. This simulation was performed for a 45 g carbohydrate meal, and employed the initial conditions and parameter values reported by Dalla Man *et al.* [1]

**Table 1.** Parameter functions and values for the meal model estimated to best characterize patients with type 2 diabetes by Dalla Man *et al.* .

| Meal model parameters |                               |                                                                        |
|-----------------------|-------------------------------|------------------------------------------------------------------------|
| Name                  | Nominal Value                 | Meaning                                                                |
| BW                    | 80 kg                         | Body Weight                                                            |
| $V_G$                 | 1.49 dl/kg                    | Plasma glucose space                                                   |
| $k_1$                 | $0.042 \text{ min}^{-1}$      | Glucose exchange rate between rapidly and slowly equilibrating tissues |
| $k_2$                 | $0.071 \text{ min}^{-1}$      | Glucose exchange rate between rapidly and slowly equilibrating tissues |
| $V_I$                 | 0.04 l/kg                     | Plasma insulin space                                                   |
| $m_1$                 | $0.379 \text{ min}^{-1}$      | Insulin subsystem exchange rate                                        |
| $m_2$                 | $0.673 \text{ min}^{-1}$      | Insulin subsystem exchange rate                                        |
| $m_4$                 | $0.269 \text{ min}^{-1}$      | Insulin subsystem exchange rate                                        |
| $m_5$                 | $0.0526 \text{ min kg/pmole}$ | Insulin subsystem exchange rate                                        |
| $m_6$                 | 0.8118                        | Insulin subsystem exchange rate                                        |
| $HE_b$                | 0.6                           | Hepatic insulin extraction                                             |
| $k_{max}$             | $0.0465 \text{ min}^{-1}$     | Maximum emptying rate of glucose from stomach to intestine             |
| $k_{min}$             | $0.0076 \text{ min}^{-1}$     | Minimum emptying rate of glucose from stomach to intestine             |
| $k_{abs}$             | $0.023 \text{ min}^{-1}$      | Intestinal absorption rate                                             |
| $k_{gri}$             | $0.0465 \text{ min}^{-1}$     | Rate of Grinding                                                       |
| $f$                   | 0.90                          | Fraction of intestinal absorption to appear in plasma                  |
| $b$                   | 0.68                          | Meal-dose dependency of emptying rate decline                          |
| $c$                   | $0.00023 \text{ mg}^{-1}$     | Meal-dose dependency of emptying rate increase                         |
| $\alpha_{meal}$       | 0.013                         | Rate of approach to minimum stomach emptying rate                      |
| $\beta_{meal}$        | 0.05                          | Rate of approach to maximum stomach emptying rate                      |

**Table 2.** Parameter functions and values for the meal model estimated to best characterize patients with type 2 diabetes by Dalla Man *et al.* (continued).

| Meal model parameters cont. |                              |                                                                 |
|-----------------------------|------------------------------|-----------------------------------------------------------------|
| Name                        | Nominal Value                | Meaning                                                         |
| $k_{p1}$                    | 3.09 mg/kg/min               | Extrapolated EGP at zero glucose and insulin                    |
| $k_{p2}$                    | 0.0007 min <sup>-1</sup>     | Liver glucose effectiveness                                     |
| $k_{p3}$                    | 0.005 mg/kg/min per pmol/l   | Amplitude of insulin action on the liver                        |
| $k_{p4}$                    | 0.0786 mg/kg/min per pmol/kg | Amplitude of portal insulin action on liver                     |
| $k_i$                       | 0.0066 min <sup>-1</sup>     | Delay between insulin signal and insulin action                 |
| $F_{cns}$                   | 1 mg/kg/min                  | Glucose uptake by brain and erythrocytes                        |
| $V_{m0}$                    | 4.65 mg/kg/min               | Glucose utilization Michaelis-Menten nominal velocity           |
| $V_{mx}$                    | 0.034 mg/kg/min per pmol/l   | Glucose utilization Michaelis-Menten insulin-dependent velocity |
| $K_{m0}$                    | 466.21 mg/kg                 | Glucose utilization Michaelis-Menten nominal constant           |
| $K_{mx}$                    | 0 mg/kg                      | Glucose utilization Michaelis-Menten insulin-dependent constant |
| $p_{2U}$                    | 0.0840 min <sup>-1</sup>     | Insulin action rate on peripheral glucose utilization           |
| $K$                         | 0.99 pmol/kg per mg/dl       | Pancreatic responsiveness to glucose rate of change             |
| $\alpha$                    | 0.013 min <sup>-1</sup>      | Delay between glucose signal and insulin secretion              |
| $\beta$                     | 0.05 pmol/kg/min per mg/dl   | Pancreatic responsiveness to glucose                            |
| $\gamma$                    | 0.5 min <sup>-1</sup>        | Exchange rate between portal vein and liver                     |
| $k_{e1}$                    | 0.0007 min <sup>-1</sup>     | Glomerular filtration rate                                      |
| $k_{e2}$                    | 269 mg/kg                    | Renal threshold of glucose                                      |

## References

1. Man CD, Rizza R, Corbelli C. Meal simulation model of the glucose-insulin system. *IEEE Transactions on biomedical engineering*. 2007;54:1740–1749.
2. Dalla Man C, Camilleri M, Cobelli C. A System Model of Oral Glucose Absorption: Validation on Gold Standard Data. *IEEE Transactions on Biomedical Engineering*. 2006;53(12):2472–2478. doi:10.1109/TBME.2006.883792.
